# Supplementary material for: Metabolomics Approaches for the Diagnosis, Treatment, and Better Disease Management of Viral Infections
Source: MDPI journal article supplement (doi:10.3390/metabo13080948), 2023-08-15
Supplement: s1 [file s1]

**Table S2.** Abbreviations list

| <b>Abbreviation</b> | <b>Definition</b>                               |
|---------------------|-------------------------------------------------|
| AdV                 | Adenovirus                                      |
| APCI                | Atmosphere pressure chemical ionization         |
| APPI                | Atmospheric pressure photoionization            |
| BM                  | Bacterial meningitis                            |
| cART                | Combination antiretroviral therapy              |
| CHB                 | Chronic hepatitis B                             |
| CRP                 | C-reactive protein                              |
| CSF                 | Cerebrospinal fluid                             |
| CNS                 | Central nervous system                          |
| EBOV                | Ebola virus                                     |
| EI                  | Electronic impact ionization                    |
| EM                  | Encephalomyelitis syndrome                      |
| ESI                 | Electrospray ionization                         |
| ESR                 | Erythrocyte sedimentation rate                  |
| GC-MS               | Gas chromatography–mass spectrometry (GC-MS)    |
| H1N1                | Spanish influenza                               |
| H2N2                | Asian influenza                                 |
| H3N2                | Hong Kong influenza                             |
| HPAI                | Avian influenza                                 |
| H7N9                | Mexican influenza                               |
| HBV                 | Hepatitis B virus                               |
| HCV                 | Hepatitis C virus                               |
| HCC                 | Hepatocellular carcinoma                        |
| HCMV                | Human cytomegalovirus                           |
| HCMV-IH             | HCMV-associated infantile hepatitis             |
| HCMV-ICH            | HCMV-infantile cholestatic hepatopathy          |
| HCMV-EBHA           | HCMV-extrahepatic biliary atresia               |
| HDV                 | Hepatitis D virus                               |
| HIV                 | Human immunodeficiency virus                    |
| HIV/AIDS            | Acquired immunodeficiency syndrome              |
| hMPV                | Human metapneumovirus                           |
| ICU                 | Intensive care unit                             |
| IMV                 | Invasive mechanical ventilation                 |
| IV                  | Influenza virus                                 |
| LC-MS               | Liquid chromatography-mass spectrometry (LC-MS) |
| MERS-CoV            | Middle East respiratory syndrome                |
| MPOX:               | Monkeypox                                       |
| MS                  | Mass spectrometry                               |
| MS/MS               | MS/MS : Tandem mass spectrometry                |
| m/z                 | Mass/charge                                     |
| NAAT                | Nucleic acid amplification test                 |
| NCDs                | Non-communicable diseases                       |
